# Supplementary material
Source: PubMed Central journal article supplement (PMC6669893)

## Supplement:

The BASILICA Trial: A prospective multi-centre cohort study of intentional leaflet laceration before transcatheter aortic valve implantation (TAVI) to prevent coronary obstruction

## Study selection criteria

### Inclusion Criteria

- Adults age  $\geq 21$  years
- High or extreme risk of surgical aortic valve replacement according to the local multidisciplinary heart team
- Undergoing TAVI for valve-in-valve or native aortic valve failure (“on-label” TAVI)
- Deemed likely to suffer coronary artery obstruction from TAVI according to multidisciplinary heart team
- Concurrence of the study eligibility committee

### Exclusion criteria

- Subjects unable to consent to participate, unless the subject has a legally authorized representative
- Excessive target aortic leaflet calcification or masses on baseline CT
- Survival despite successful procedure expected  $< 12$  months
- Planned concurrent valve intervention in the same setting (such as transcatheter mitral valve therapy or paravalvular leak therapy)
- Subjects unwilling to participate or unwilling to return for study follow-up activities.
- Pregnancy or intent to become pregnant prior to completion of all protocol follow-up procedures

## Trial endpoints

### Primary efficacy endpoint

The **primary efficacy endpoint** is procedure success (measured at exit from the catheterization laboratory). All of the following must be present:

- Successful BASILICA traversal and laceration of the intended aortic leaflet; and
- Absence of procedural mortality; and
- Successful access, delivery, and retrieval of the BASILICA device system; and
- Successful TAVI device implantation; and
- Absence of acute life-threatening ostial coronary artery obstruction (by immediate hemodynamics, by angiography, and by iFR  $< 0.89$  if obtained)
- Freedom from emergency cardiac surgery or reintervention related to the BASILICA TAVI procedure, including attempted implantation of coronary artery stents to treat TAVI-induced coronary artery obstruction.

### Additional details about primary endpoint

Valve post-dilatation is not considered unplanned re-intervention. When pre-positioned coronary artery stents are not able to be retrieved, they may be implanted without impacting the primary endpoint.

### Primary safety endpoint

The **primary safety endpoint** is freedom from major adverse clinical events (MACE) according to VARC-2 at 30days:

- All-cause mortality
- All stroke (disabling and non-disabling)
- Life-threatening bleeding
- Acute kidney injury—Stage 2 or 3 (including renal replacement therapy)
- Coronary artery obstruction requiring intervention
- Major vascular complication
- Valve-related dysfunction requiring repeat procedure (BAV, TAVI, or SAVR)

### Additional endpoints

- Technical success, defined as clinical success irrespective of coronary artery stenting
- Clinical success without stroke, as determined by site physicians
- Technical success of BASILICA only (delivery and removal of BASILICA catheter equipment, traversal, and laceration of intended aortic leaflet)
- Coronary artery obstruction measured as instantaneous wave-free pressure ratio (iFR) or related measurements using a solid-state pressure-transducer guidewire, if measured
- Survival to discharge, to 30d, and to 12mo
- Neurological events as reported by the site clinicians
- Access and vascular complications
- Peri-procedural and spontaneous acute myocardial infarction
- Pericardial effusion or tamponade
- VARC-2 bleeding complications
- Acute kidney injury
- Freedom from hemolytic anemia related to BASILICA TAVI
- BASILICA Device or Procedure related technical failure: acute embolism, mitral valve injury, traversal into left atrium, coronary artery injury induced by BASILICA, etc.
- Rotational orientation of transcatheter heart valve commissures with regard to coronary artery ostia
- Hemodynamic instability caused by BASILICA before TAVI
- TAVI thrombosis on CT or echocardiography during follow-up
- Endocarditis during follow-up
- Outcomes for laceration of native versus surgical aortic valves, for single versus double scallop laceration, and for procedures with versus without bioprosthesis intentional overexpansion

## Enrolling Sites

| <b>Site</b>                        | <b>City</b>   | <b>Principal Investigator</b> | <b>Subjects enrolled</b> |
|------------------------------------|---------------|-------------------------------|--------------------------|
| Emory University Hospital          | Atlanta       | Vasilis Babaliaros            | 10 Subjects              |
| University of Washington           | Seattle       | Danny Dvir                    | 10 Subjects              |
| Henry Ford Hospital Systems        | Detroit       | Adam Greenbaum and Marvin Eng | 7 subjects               |
| Medstar Washington Hospital Center | Washington DC | Toby Rogers                   | 3 subjects               |

Online Table. Coronary obstruction risk factors and BASILICA technical success for 30 subjects

| Age | Sex | TAVI setting | High risk features of bioprosthesis | Aortic valve mean gradient | Aortic regurg. severity | Annulus area (mm <sup>2</sup> ) | LCA height (mm) | RCA height (mm) | Left SOV width (mm) | Right SOV width (mm) | LCA VTC (mm) | RCA VTC (mm) | TAVI access | THV implanted | Valve size (mm) | # of leaflet targets | 1 <sup>st</sup> leaflet attempted | 1 <sup>st</sup> leaflet successful traversal | 1 <sup>st</sup> leaflet successful laceration | 2 <sup>nd</sup> leaflet attempted | 2 <sup>nd</sup> leaflet successful traversal | 2 <sup>nd</sup> leaflet successful laceration |
|-----|-----|--------------|-------------------------------------|----------------------------|-------------------------|---------------------------------|-----------------|-----------------|---------------------|----------------------|--------------|--------------|-------------|---------------|-----------------|----------------------|-----------------------------------|----------------------------------------------|-----------------------------------------------|-----------------------------------|----------------------------------------------|-----------------------------------------------|
| 83  | F   | Magna        |                                     | 51                         | Mild                    | 260                             | 9.7             | 15.7            | 30.3                | 27.7                 | 7.8          | 5.0          | Femoral     | Evolut R      | 23              | 2                    | Right                             | Yes                                          | Yes                                           | Left                              | Yes                                          | Yes                                           |
| 75  | F   | Magna        |                                     | 61                         | Mild                    | 262                             | 3.7             | 0.0             | 24.4                | 25.3                 | 2.0          | 3.7          | Transcaval  | Evolut R      | 23              | 2                    | Right                             | Yes                                          | Yes                                           | Left                              | Yes                                          | Yes                                           |
| 67  | M   | Magna Ease   |                                     | 41                         | None                    | 265                             | 5.2             | 6.4             | 25.5                | 24.9                 | 4.4          | 4.0          | Femoral     | Evolut Pro    | 23              | 2                    | Right                             | Yes                                          | Yes                                           | Left                              | Yes                                          | Yes                                           |
| 82  | F   | Magna Ease   |                                     | 43                         | None                    | 268                             | 6.3             | 8.9             | 24.6                | 23.9                 | 2.2          | 4.0          | Femoral     | Sapien 3      | 23              | 2                    | Right                             | Yes                                          | Yes                                           | Left                              | Yes                                          | Yes                                           |
| 92  | F   | Mitroflow    | Ext. leaflets                       | 33                         | Moderate                | 259                             | 8.9             | 6.6             | 26.2                | 23.2                 | 2.2          | 2.9          | Femoral     | Sapien 3      | 20              | 2                    | Right                             | Yes                                          | Yes                                           | Left                              | Yes                                          | Yes                                           |
| 77  | F   | Mitroflow    | Ext. leaflets                       | 56                         | None                    | 290                             | 5.4             | 8.7             | 25.2                | 25.1                 | 1.7          | 3.8          | Femoral     | Sapien 3      | 20              | 2                    | Right                             | No                                           | N/A                                           | Left                              | Yes                                          | Yes                                           |
| 79  | F   | Mitroflow    | Ext. leaflets                       | 81                         | None                    | 305                             | 5.7             | 9.7             | 28.8                | 33.3                 | 5.5          | 3.2          | Transcaval  | Evolut R      | 23              | 1                    | Left                              | Yes                                          | Yes                                           |                                   |                                              |                                               |
| 67  | F   | Trifecta     | Ext. leaflets                       | 43                         | Mild                    | 277                             | 4.1             | 5.6             | 25.9                | 24.2                 | 3.4          | 3.9          | Femoral     | Evolut R      | 23              | 1                    | Left                              | Yes                                          | Yes                                           |                                   |                                              |                                               |
| 82  | F   | Trifecta     | Ext. leaflets                       | 76                         | None                    | 226                             | 2.0             | 4.9             | 24.3                | 21.8                 | 4.0          | 2.8          | Axillary    | Evolut R      | 23              | 1                    | Left                              | Yes                                          | Yes                                           |                                   |                                              |                                               |
| 69  | F   | Trifecta     | Ext. leaflets                       | 73                         | Moderate                | 260                             | 2.7             | 5.3             | 25.1                | 22.9                 | 5.7          | 3.3          | Femoral     | Evolut R      | 23              | 1                    | Left                              | No                                           | N/A                                           |                                   |                                              |                                               |
| 62  | M   | Freestyle    | Stentless                           | 17                         | Moderate                | 393                             | 7.2             | 12.1            | 31.1                | 39.2                 | 3.3          | 4.6          | Femoral     | Evolut Pro    | 29              | 1                    | Left                              | Yes                                          | Yes                                           |                                   |                                              |                                               |
| 69  | M   | Toronto SPV  | Stentless                           | 9                          | Severe                  | 477                             | 3.9             | 4.2             | 30.0                | 31.6                 | 3.8          | 5.2          | Femoral     | Evolut R      | 29              | 1                    | Left                              | Yes                                          | Yes                                           |                                   |                                              |                                               |
| 83  | F   | Magna        |                                     | 43                         | Moderate                | 262                             | 12.3            | 11.7            | 26.4                | 27.2                 | 2.9          | 5.6          | Femoral     | Evolut R      | 23              | 1                    | Left                              | Yes                                          | Yes                                           |                                   |                                              |                                               |
| 76  | F   | Magna        |                                     | 42                         | None                    | 243                             | 2.5             | 4.3             | 29.0                | 28.1                 | 3.0          | 7.2          | Femoral     | Evolut R      | 23              | 1                    | Left                              | Yes                                          | Yes                                           |                                   |                                              |                                               |
| 74  | M   | Magna        |                                     | 37                         | Mild                    | 489                             | 3.3             | 6.9             | 28.6                | 27.9                 | 3.2          | 5.1          | Femoral     | Sapien 3      | 26              | 1                    | Left                              | Yes                                          | Yes                                           |                                   |                                              |                                               |
| 73  | F   | Magna Ease   |                                     | 38                         | None                    | 259                             | 1.7             | 8.2             | 26.9                | 24.8                 | 4.3          | 2.9          | Femoral     | Evolut R      | 23              | 1                    | Right                             | Yes                                          | Yes                                           |                                   |                                              |                                               |
| 81  | M   | Mosaic       |                                     | 45                         | None                    | 293                             | 13.7            | 6.7             | 32.6                | 28.7                 | 5.5          | 4.2          | Transcaval  | Sapien 3      | 23              | 1                    | Right                             | Yes                                          | Yes                                           |                                   |                                              |                                               |
| 74  | F   | Native       |                                     | 45                         | Mild                    | 307                             | 6.5             | 8.1             | 27.2                | 25.9                 | 3.8          | 3.9          | Transcaval  | Sapien 3      | 23              | 2                    | Right                             | Yes                                          | Yes                                           | Left                              | Yes                                          | Yes                                           |
| 59  | F   | Native       |                                     | 39                         | Mild                    | 227                             | 12.2            | 11.3            | 20.8                | 20.5                 | 3.5          | 2.4          | Femoral     | Evolut R      | 23              | 1                    | Right                             | Yes                                          | Yes                                           |                                   |                                              |                                               |
| 82  | F   | Native       |                                     | 43                         | Mild                    | 306                             | 11.4            | 12.4            | 26.0                | 25.8                 | 5.7          | 2.3          | Femoral     | Sapien 3      | 20              | 1                    | Right                             | Yes                                          | Yes                                           |                                   |                                              |                                               |
| 62  | F   | Native       |                                     | 59                         | Mild                    | 366                             | 12.7            | 9.6             | 27.3                | 22.2                 | 2.9          | 3.3          | Femoral     | Sapien 3      | 23              | 1                    | Right                             | Yes                                          | Yes                                           |                                   |                                              |                                               |
| 85  | M   | Native       |                                     | 45                         | Moderate                | 585                             | 10.1            | 10.4            | 33.9                | 33.2                 | 3.9          | 5.0          | Femoral     | Sapien 3      | 29              | 1                    | Left                              | Yes                                          | Yes                                           |                                   |                                              |                                               |
| 76  | F   | Native       |                                     | 34                         | Mild                    | 471                             | 13.2            | 11.4            | 31.8                | 31.0                 | 4.1          | 5.9          | Femoral     | Sapien 3      | 26              | 1                    | Left                              | Yes                                          | Yes                                           |                                   |                                              |                                               |
| 76  | F   | Native       |                                     | 26                         | None                    | 536                             | 12.0            | 12.0            | 29.0                | 32.6                 | 2.6          | 3.1          | Transcaval  | Sapien 3      | 26              | 1                    | Left                              | Yes                                          | Yes                                           |                                   |                                              |                                               |
| 61  | F   | Native       |                                     | 53                         | Mild                    | 234                             | 10.9            | 10.1            | 20.7                | 20.3                 | 1.6          | 1.3          | Transcaval  | Sapien 3      | 20              | 1                    | Left                              | Yes                                          | Yes                                           |                                   |                                              |                                               |
| 75  | F   | Native       |                                     | 19                         | None                    | 379                             | 7.8             | 10.3            | 25.9                | 25.3                 | 2.7          | 4.5          | Femoral     | Sapien 3      | 23              | 1                    | Left                              | Yes                                          | Yes                                           |                                   |                                              |                                               |
| 52  | F   | Native       |                                     | 48                         | Moderate                | 522                             | 5.8             | 7.8             | 29.8                | 29.5                 | 3.1          | 3.5          | Femoral     | Sapien 3      | 26              | 1                    | Left                              | Yes                                          | Yes                                           |                                   |                                              |                                               |
| 77  | F   | Native       |                                     | 46                         | Mild                    | 274                             | 13.3            | 13.8            | 24.3                | 23.1                 | 2.7          | 4.7          | Femoral     | Evolut Pro    | 23              | 1                    | Left                              | Yes                                          | Yes                                           |                                   |                                              |                                               |
| 79  | F   | Native       |                                     | 22                         | None                    | 446                             | 8.8             | 13.8            | 29.0                | 29.7                 | 1.7          | 4.3          | Femoral     | Sapien 3      | 26              | 1                    | Left                              | Yes                                          | Yes                                           |                                   |                                              |                                               |
| 82  | F   | Native       |                                     | 53                         | None                    | 450                             | 4.6             | 12.3            | 30.9                | 31.2                 | 3.2          | 4.1          | Femoral     | Sapien 3      | 26              | 1                    | Left                              | Yes                                          | Yes                                           |                                   |                                              |                                               |

## Online Figure 1. Procedure Hemodynamics

Mean arterial pressures for each patient is shown at baseline, before and after (*solo* or *doppio*) laceration, and after TAVI for native and bioprosthetic valves. Small decrements in mean arterial pressures were seen more often in native aortic valves. Only two subjects required transient increase in vasopressor support prior to TAVI.

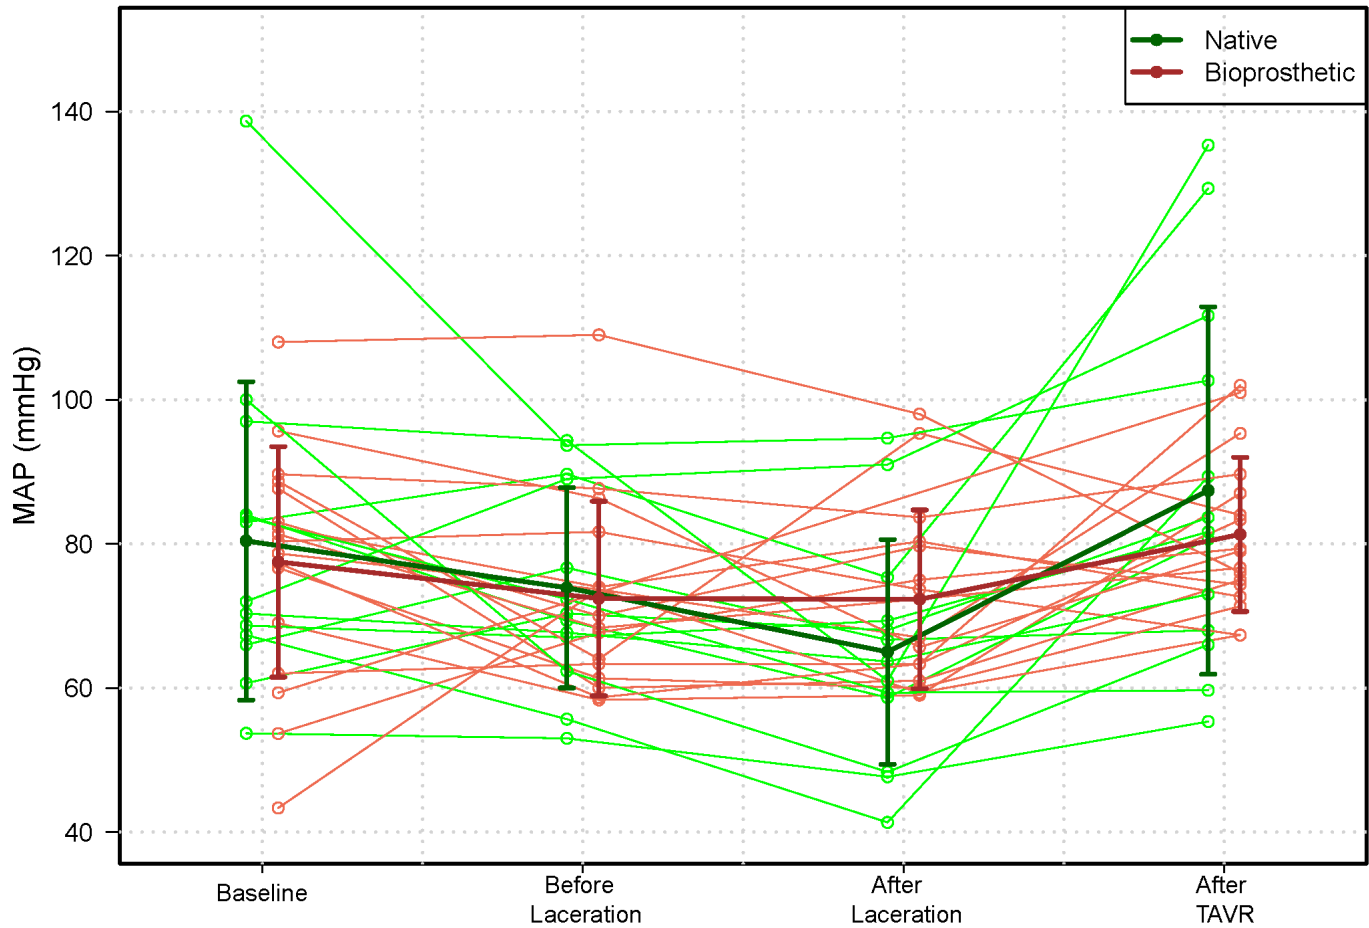

Supplement: NIHMS1042737-supplement-1.pdf [file NIHMS1042737-supplement-1.pdf]
